# Supplementary material for: A sandwich-type tetrakis(phthalocyaninato) europium–cadmium quadruple-decker complex: structural, spectroscopic, OFET, and gas sensing properties
Source: Royal Society of Chemistry journal article supplement (doi:10.1039/c9nj03342d), 2019-01-01
Supplement: c9nj03342d1.pdf [file c9nj03342d1.pdf]

## Supporting Information for

### **Sandwich-type tetrakis(phthalocyaninato) europium-cadmium quadruple-decker: structure, spectroscopic, OFET and gas sensor**

*Guang Lu,<sup>a,c</sup> Xia Kong,<sup>c</sup> Hailong Wang,<sup>a</sup> Yuxiang Chen,<sup>d</sup> Chuangyu Wei,<sup>b</sup> Yanli Chen,<sup>b,\*</sup> and*

*Jianzhuang Jiang<sup>a,b,\*</sup>*

<sup>a</sup> Beijing Key Laboratory for Science and Application of Functional Molecular and Crystalline Materials, Department of Chemistry, University of Science and Technology Beijing, Beijing 100083, China

<sup>b</sup> School of Materials Science and Engineering, Institute of Advanced Materials, China University of Petroleum (East China), Qingdao 266580, China

<sup>c</sup> School of Chemistry and Environmental Engineering, Shandong University of Science and Technology, Qingdao 266510, China

<sup>d</sup> School of Pharmaceutical and Chemical Engineering, Taizhou University, Taizhou 318000, China.

#### **Corresponding Author**

\*E-mail: [jianzhuang@ustb.edu.cn](mailto:jianzhuang@ustb.edu.cn) (J. Jiang) and [yanlichen@upc.edu.cn](mailto:yanlichen@upc.edu.cn) (Y. Chen).

## Experimental Section

*Measurements.* Electronic absorption spectra were recorded with a Hitachi U-4100 spectrophotometer.  $^1\text{H}$  NMR spectra were recorded on a Bruker DPX 400 spectrometer in  $\text{CDCl}_3$ . Spectra were referenced internally using the residual solvent resonance ( $\delta = 7.26$  for  $^1\text{H}$  NMR) relative to  $\text{SiMe}_4$ . MALDI-TOF mass spectra were taken on a Bruker BIFLEX III ultra-high-resolution. Elemental analyses were performed on an Elementar Vavio El III. Electrochemical measurement was carried out with a BAS CV-50W voltammetric analyzer. The cell comprised inlets for a glassy-carbon-disk working electrode with a diameter of 2.0 mm in diameter and a silver-ware counter electrode. The reference electrode was  $\text{Ag}^+/\text{Ag}$  (a solution of 0.01 M  $\text{AgNO}_3$  and 0.1 M TBAP in acetonitrile), which was connected to the solution by a Luggin capillary whose tip was placed close to the working electrode. It was corrected for junction potentials by being referenced internally to the ferrocenium/ferrocene ( $\text{Fc}^+/\text{Fc}$ ) couple [ $E_{1/2}(\text{Fc}^+/\text{Fc}) = 0.501$  V vs. SCE]. Typically, a 0.1 M solution of  $[\text{NBu}_4][\text{ClO}_4]$  in  $\text{CH}_2\text{Cl}_2$  containing 1 mM of sample was purged with nitrogen for 10 min, and then the voltammogram was recorded at ambient temperature. The scan rate was  $20 \text{ mV s}^{-1}$  for the CV measurement. X-ray diffraction experiment was carried out on a Bruker AXS D8 ADVANCE X-ray diffractometer. AFM images were collected in air under ambient conditions using the tapping mode with a NanoscopeIII/Bioscope scanning probe microscope from Digital instruments. The sensor property was measured by Keysight 1912A under  $\text{N}_2$  gas, and OFET property was measured by HP 4140B in the air.

*Chemicals.* Anhydrous 1,2,4-trichlorobenzene (TCB) and 1,8-diazabicyclo[5.4.0]undec-7-ene (DBU) were purchased from Aldrich. Dichloromethane for voltammetric studies was freshly distilled from  $\text{CaH}_2$  under an atmosphere of nitrogen. Column chromatography was carried out on silica gel (Merck, Kieselgel 60, 70-230 mesh) with the indicated eluents. All other reagents and solvents were used as received. The

compounds of  $\text{Eu}(\text{acac})_3 \cdot n\text{H}_2\text{O}$  and  $\text{Eu}[\text{Pc}(\text{SC}_6\text{H}_{13})_8]_2$  were prepared according to the literature methods.<sup>1-2</sup>

*Synthesis of  $\{[\text{Pc}(\text{SC}_6\text{H}_{13})_8]\text{Eu}[\text{Pc}(\text{SC}_6\text{H}_{13})_8]\text{Cd}[\text{Pc}(\text{SC}_6\text{H}_{13})_8]\text{Eu}[\text{Pc}(\text{SC}_6\text{H}_{13})_8]\}$  (I).* In a Schlenk flask, the mixture of  $\text{Eu}[\text{Pc}(\text{SC}_6\text{H}_{13})_8]_2$  (91 mg, 0.03 mmol) and  $\text{Cd}(\text{OAc})_2 \cdot \text{H}_2\text{O}$  (7.7 mg, 0.03 mmol) in TCB (2 mL) was heated to reflux under nitrogen for 6 h, and then the solvent was removed under reduced pressure and the residue was purified by flash chromatography on silica gel eluting with  $\text{CHCl}_3$  and *n*-hexane (1:1, v/v), then the solvent was removed under reduced pressure. Repeated chromatography followed by recrystallization from  $\text{CHCl}_3$  and *n*-hexane gave pure compound as a dark powder. Yield: 80 mg (84 %).  $^1\text{H}$  NMR (400 MHz,  $\text{CDCl}_3$ ,  $\delta$ ): 10.02 (s, 16 H, Pc- $\alpha$ -H), 9.15 (s, 16 H, Por- $\alpha$ -H), 4.80 (m, 16 H,  $-\text{SCH}_2\text{CH}_2\text{CH}_2\text{CH}_2\text{CH}_2\text{CH}_3$ ), 4.72 (m, 16 H,  $-\text{SCH}_2\text{CH}_2\text{CH}_2\text{CH}_2\text{CH}_2\text{CH}_3$ ), 3.84 (m, 16 H,  $-\text{SCH}_2\text{CH}_2\text{CH}_2\text{CH}_2\text{CH}_2\text{CH}_3$ ), 3.39 (m, 16 H,  $-\text{SCH}_2\text{CH}_2\text{CH}_2\text{CH}_2\text{CH}_2\text{CH}_3$ ), 3.22 (m, 32 H,  $-\text{SCH}_2\text{CH}_2\text{CH}_2\text{CH}_2\text{CH}_2\text{CH}_3$ ), 2.94 (m, 32 H,  $-\text{SCH}_2\text{CH}_2\text{CH}_2\text{CH}_2\text{CH}_2\text{CH}_3$ ), 2.37 (m, 32 H,  $-\text{SCH}_2\text{CH}_2\text{CH}_2\text{CH}_2\text{CH}_2\text{CH}_3$ ), 2.26 (m, 32 H,  $-\text{SCH}_2\text{CH}_2\text{CH}_2\text{CH}_2\text{CH}_2\text{CH}_3$ ), 2.00 (m, 32 H,  $-\text{SCH}_2\text{CH}_2\text{CH}_2\text{CH}_2\text{CH}_2\text{CH}_3$ ), 1.75 (m, 32 H,  $-\text{SCH}_2\text{CH}_2\text{CH}_2\text{CH}_2\text{CH}_2\text{CH}_3$ ), 1.38 (m, 64 H,  $-\text{SCH}_2\text{CH}_2\text{CH}_2\text{CH}_2\text{CH}_2\text{CH}_3$ ), 1.65 (m, 48 H,  $-\text{SCH}_2\text{CH}_2\text{CH}_2\text{CH}_2\text{CH}_2\text{CH}_3$ ), 0.85 (m, 48 H,  $-\text{SCH}_2\text{CH}_2\text{CH}_2\text{CH}_2\text{CH}_2\text{CH}_3$ ), Figure S3 (Supporting Information). MALDI-TOF MS: an isotopic cluster peaking at  $m/z$  6185,  $[\text{M}]^+$ , 6185, Figure S2 (Supporting Information). Anal. Calc. Anal. Calc. For  $\text{C}_{320}\text{H}_{448}\text{CdEu}_2\text{N}_{32}\text{S}_{32}$ : C, 62.14%; H, 7.30%; N, 7.25%. Found: C, 61.92%; H, 7.30%; N, 7.28%.

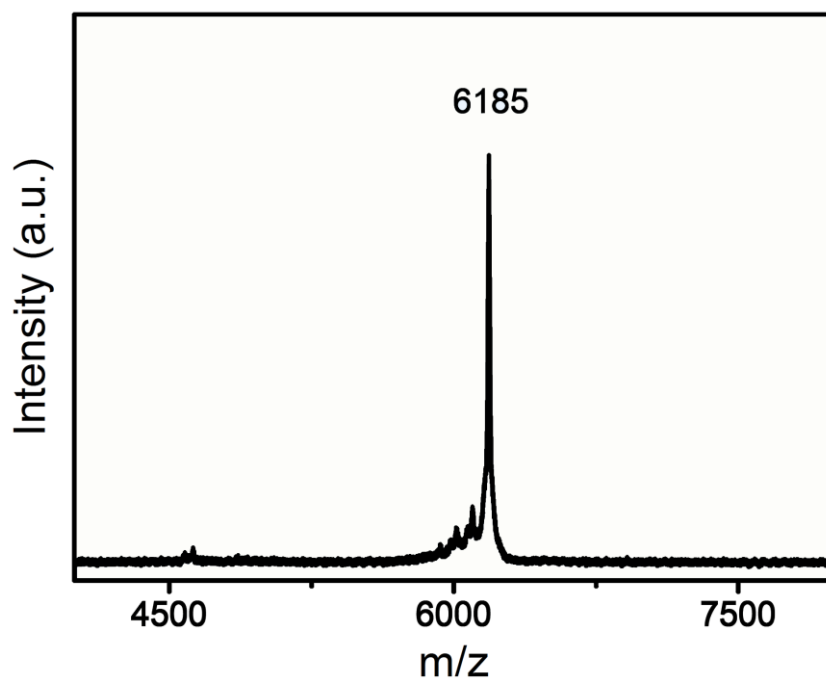

**Fig. S1.** Experimental isotopic pattern for the molecular ion of compound **1** shown in the MALDI-TOF mass spectrum.

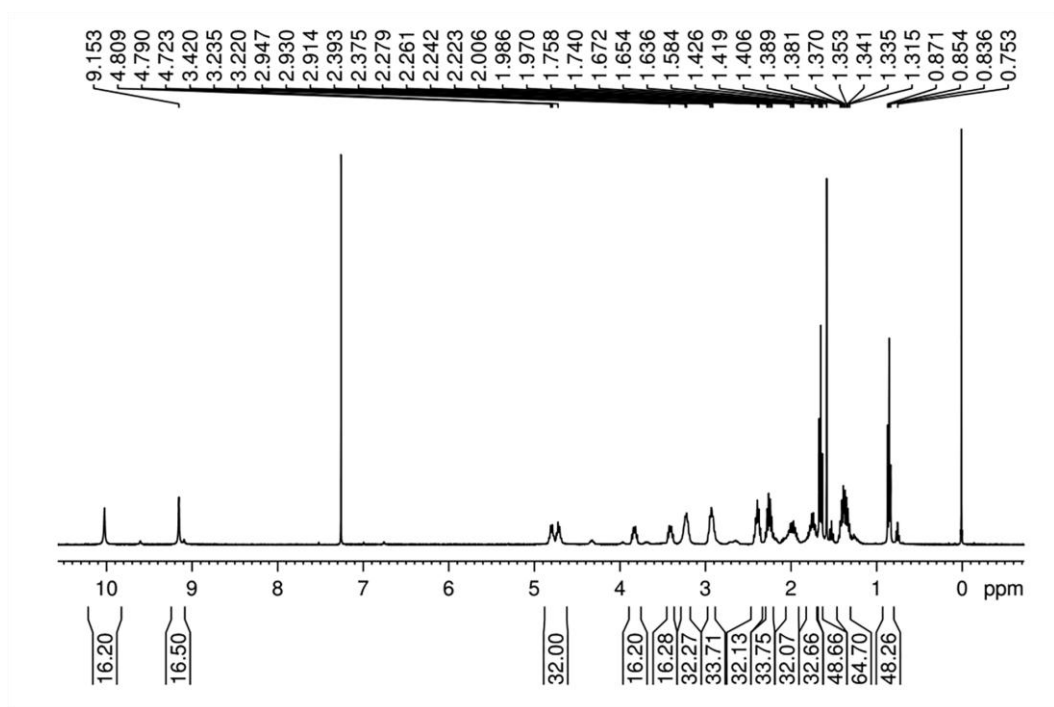

**Fig. S2.** <sup>1</sup>H NMR spectrum of compound **1** in CDCl<sub>3</sub>.

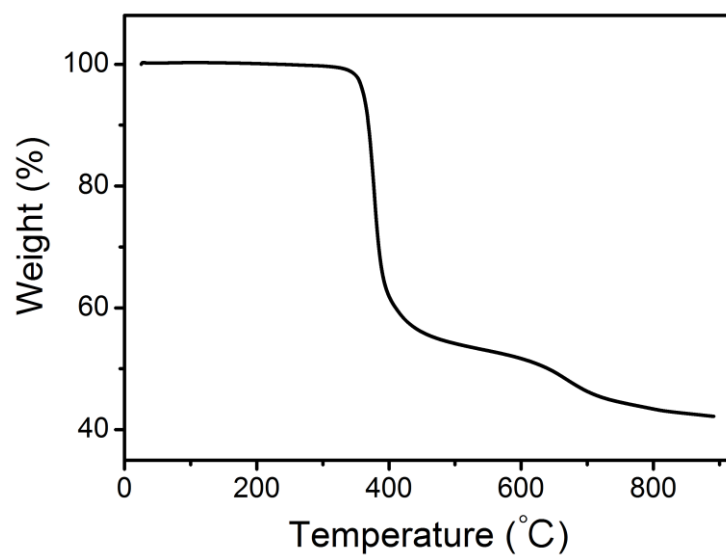

**Fig. S3.** Thermogravimetric analysis of complex **1**.

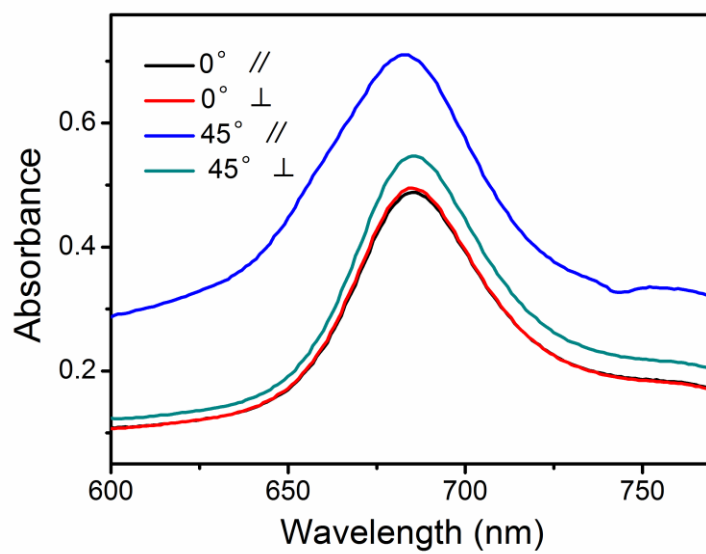

**Fig. S4.** Polarized UV-vis spectra for QLS film of **1**.

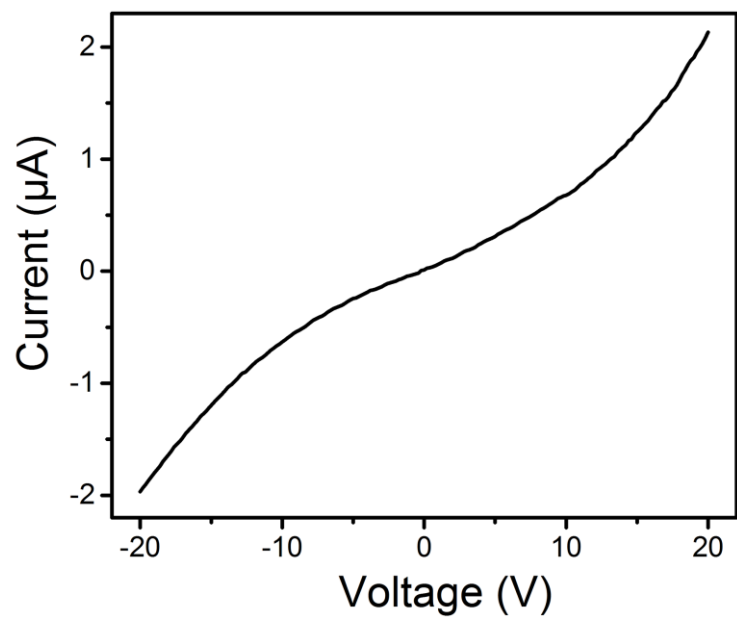

**Fig. S5.** I-V curve of the QLS film of **1**.



**Table S1.** Half-wave redox potentials (V vs SCE) in CH<sub>2</sub>Cl<sub>2</sub> containing 0.1 mol dm<sup>-3</sup> [Bu<sub>4</sub>N][ClO<sub>4</sub>] together with the HOMO and LUMO levels of **1**.

| Compound   | Oxd <sub>3</sub> /V | Oxd <sub>2</sub> /V | Oxd <sub>1</sub> /V | Red <sub>1</sub> /V | E <sub>HOMO</sub><br>/eV <sup>[b]</sup> | E <sub>LUMO</sub><br>/eV <sup>[c]</sup> | ΔE <sup>o</sup> <sub>1/2</sub> /V <sup>[a]</sup> |
|------------|---------------------|---------------------|---------------------|---------------------|-----------------------------------------|-----------------------------------------|--------------------------------------------------|
| <b>(1)</b> | 1.00                | 0.65                | 0.37                | -0.59               | -4.81                                   | -3.85                                   | 0.97                                             |

<sup>[a]</sup> ΔE<sup>o</sup><sub>1/2</sub> = Oxd<sub>1</sub> - Red<sub>1</sub>, *i.e.* the HOMO-LUMO gap of corresponding molecule;

<sup>[b]</sup> calculated from empirical formula of HOMO = -(Oxd<sub>1</sub> + 4.44 eV);

<sup>[c]</sup> LUMO = -(Red<sub>1</sub> + 4.44 eV).

**Table S2.** The orientation angle of the phthalocyanine ring determined from polarized UV-vis absorbance of the films of of Compound **1**.

| Compound | $A_{\parallel 0^\circ}$ | $A_{\perp 0^\circ}$ | $D_{0^\circ}$ | $A_{\parallel 45^\circ}$ | $A_{\perp 45^\circ}$ | $D_{45^\circ}$ | $\theta^\circ$ |
|----------|-------------------------|---------------------|---------------|--------------------------|----------------------|----------------|----------------|
| <b>1</b> | 0.490                   | 0.498               | 0.984         | 0.713                    | 0.548                | 1.301          | 32.8°          |

**Table S3.** Comparison between the present study and the literatures about OFET property.

| OFET materials                                                                                                                                                          | $\mu_e$ (cm <sup>2</sup> V <sup>-1</sup> s <sup>-1</sup> ) | $\mu_h$ (cm <sup>2</sup> V <sup>-1</sup> s <sup>-1</sup> ) | Ref. |
|-------------------------------------------------------------------------------------------------------------------------------------------------------------------------|------------------------------------------------------------|------------------------------------------------------------|------|
| diketopyrrolopyrrole                                                                                                                                                    | $4.4 \times 10^{-4}$                                       | $8.6 \times 10^{-4}$                                       | 3    |
| Eu <sub>2</sub> [Pc(OC <sub>8</sub> H <sub>17</sub> ) <sub>8</sub> ] <sub>2</sub> [Pc(OCH <sub>2</sub> CF <sub>3</sub> ) <sub>8</sub> ]                                 | $2.14 \times 10^{-4}$                                      | $2.72 \times 10^{-2}$                                      | 4    |
| Eu <sub>2</sub> {Pc[(OC <sub>2</sub> H <sub>4</sub> ) <sub>3</sub> OCH <sub>3</sub> ] <sub>8</sub> } <sub>2</sub> [Pc(OCH <sub>2</sub> CF <sub>3</sub> ) <sub>8</sub> ] | $5.83 \times 10^{-4}$                                      | $1.3 \times 10^{-2}$                                       | 4    |
| DbT-TTAR/DTTQ-11                                                                                                                                                        | 0.83                                                       | 0.37                                                       | 5    |
| naphthalene diimide (NDI)-benzothiadiazole                                                                                                                              | $2.4 \times 10^{-3}$                                       | 0.258                                                      | 6    |
| diketopyrrolopyrrole                                                                                                                                                    | 0.1                                                        | $2 \times 10^{-3}$                                         | 7    |
| This work                                                                                                                                                               | $5.6 \times 10^{-3}$                                       | $1.2 \times 10^{-3}$                                       |      |

**Table S4.** Comparison between the present study and the literatures about gas sensors for NO<sub>2</sub> detection.

| Sensing materials                                                                                    | NO <sub>2</sub> (ppm) | Operating temperature | Ref. |
|------------------------------------------------------------------------------------------------------|-----------------------|-----------------------|------|
| Cu/ graphene                                                                                         | 1                     | room-temperature      | 8    |
| H <sub>2</sub> [Pc(OCH <sub>2</sub> (CF <sub>2</sub> ) <sub>6</sub> CF <sub>3</sub> ) <sub>4</sub> ] | 0.1                   | room-temperature      | 9    |
| silver-polypyrrole                                                                                   | 5                     | room-temperature      | 10   |
| TIPS-pentacene                                                                                       | 0.25                  | room-temperature      | 11   |
| LuPc <sub>2</sub>                                                                                    | 0.75                  | room-temperature      | 12   |
| This work                                                                                            | 0.25                  | room-temperature      |      |

## References

- (1) Y. Zhang, W. Jiang, J. Jiang and Q. Xue, *J. Porphyrins Phthalocyanines*, 2007, **11**, 100-108.
- (2) C. Huang, Y. Zhang, J. Sun, Y. Bian and D. P. Arnold. *J. Porphyrins Phthalocyanines* 2013, **17**, 673-681.
- (3) J. Zhou, S. Bi, S. Yang, H. Zhou and Y. Zhang, *Phys. Chem. Chem. Phys.*, 2018, **20**, 1787-1793.
- (4) S. Liu, H. Wang, X. Wang, S. Li, H. Liu, Y. Chen and X. Li, *J. Mater. Chem. C*, 2019, **7**, 424-433.
- (5) S. Vegiraju, C.-Y. Lin, P. Priyanka, D.-Y. Huang, X.-L. Luo, H.-C. Tsai, S.-H. Hong, C.-J. Yeh, W.-C. Lien, C.-L. Wang, S.-H. Tung, C.-L. Liu, M.-C. Chen, and A. Facchetti, *Adv. Funct. Mater.*, 2018, **28**, 1801025.
- (6) C. An, H. Makowska, B. Hu, R. Duan, W. Pisula, T. Marszalek and M. Baumgarten, *RSC Adv.*, 2018, **8**, 16464-16469.
- (7) K. Kim, J. Jeon, Y. H. Ha, H. Cha, C. E. Park, M. Kang, H. Jhon, S.-K. Kwon, Y.-H. Kim, T. K. An, *Org. Electron.*, 2018, **54**, 1-8.
- (8) Y. Seekaew, D. Phokharatkul, A. Wisitsoraat and C. Wongchoosuk, *Appl. Surf. Sci.*, 2017, **404**, 357-363.
- (9) Q. Sun, W. Feng, P. Yang, G. You and Y. Chen, *New J. Chem.*, 2018, **42**, 6713-6718.
- (10) N. Karmakar, R. Fernandes, S. Jain, U. V. Patil, N. G. Shimpi, N. V. Bhat and D. C. Kothari, *Sens. Actuators B*, 2017, **242**, 118-126.
- (11) X. Zhuang, S. Han, B. Huai, W. Shi and J. Yu, *Sens. Actuators B*, 2019, **279**, 238-244.
- (12) M. Debliqy, D. Lahem, A. Bueno-Martinez, C. Caucheteur, M. Bouvet, I. Recloux, J.-P. Raskin and M.-G. Olivier, *Sensors*, 2018, **18**, 740.
